# Supplementary material
Source: PubMed Central journal article supplement (PMC8023862)

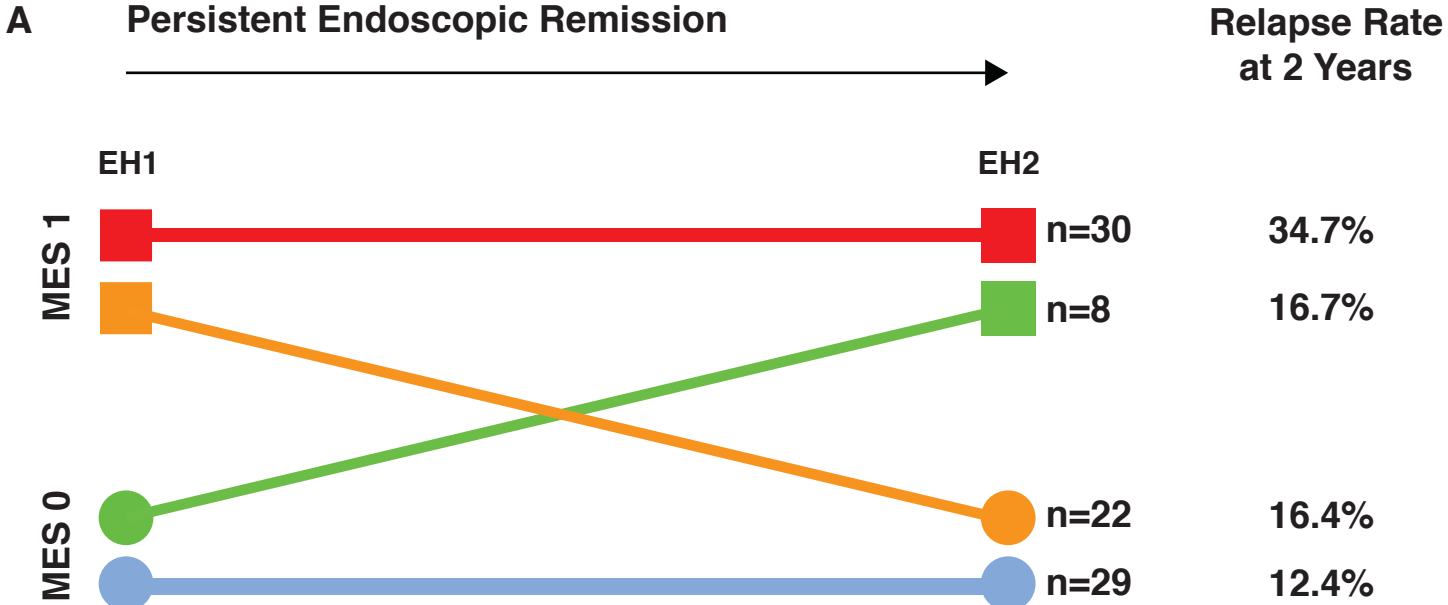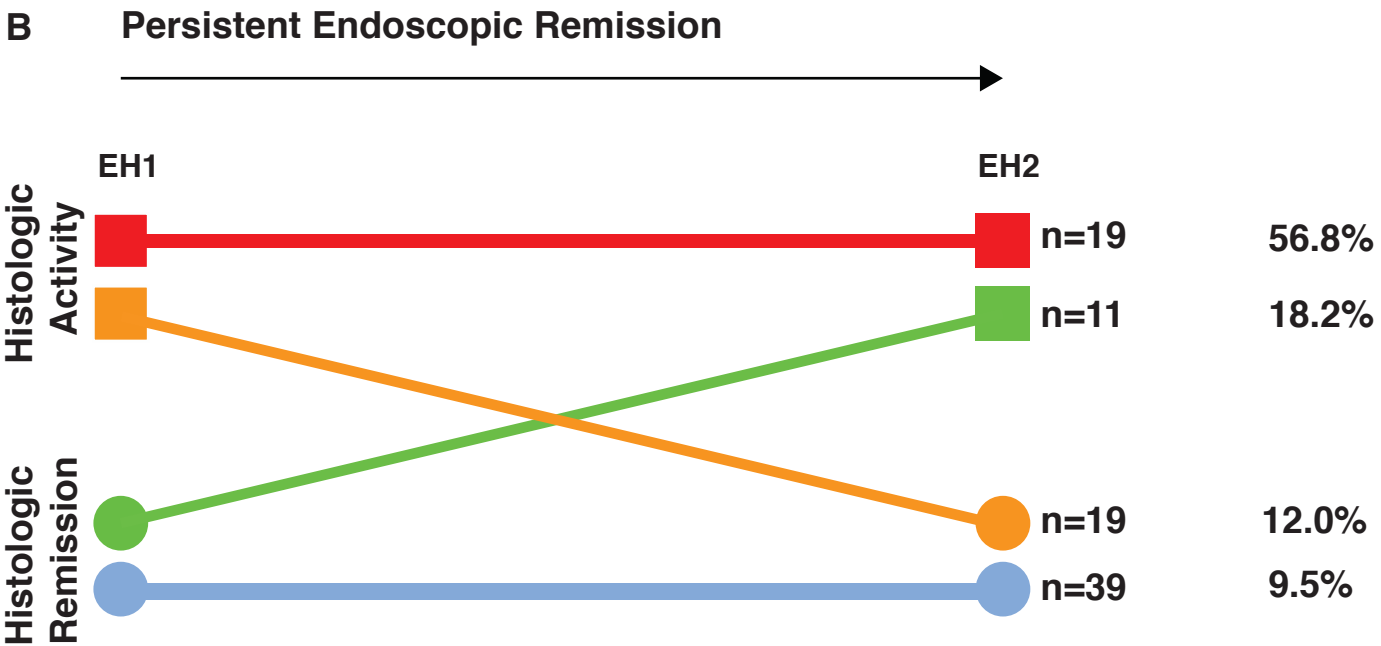

Supplement: jjaa184_suppl_supplementary_material.pdf [file jjaa184_suppl_supplementary_material.pdf]
